# Supplementary material
Source: PubMed Central journal article supplement (PMC7842214)
Supplement: NIHMS1662846-supplement-1.pdf [file NIHMS1662846-supplement-1.pdf]

## **Supplementary Tables**

**Supplementary table 1. Association of tertiles of serum isoflavones with the presence of coronary calcium score  $\geq 10$  in Japanese men, including heavy alcohol drinkers (n=303)**

|                  | Serum isoflavones tertiles |           |            |           |            | <i>P</i> for trend |
|------------------|----------------------------|-----------|------------|-----------|------------|--------------------|
|                  | Tertile 1                  | Tertile 2 |            | Tertile 3 |            |                    |
|                  |                            | OR        | 95% CI     | OR        | 95% CI     |                    |
| <b>Crude</b>     | 1.00                       | 1.58      | 0.69, 3.58 | 0.81      | 0.32, 2.05 | 0.13               |
| <b>Model I</b>   | 1.00                       | 1.78      | 0.72, 4.39 | 0.75      | 0.27, 2.09 | 0.07               |
| <b>Model II</b>  | 1.00                       | 1.92      | 0.76, 4.97 | 0.77      | 0.27, 2.22 | 0.07               |
| <b>Model III</b> | 1.00                       | 1.96      | 0.77, 4.97 | 0.78      | 0.27, 2.26 | 0.07               |

OR, odds ratio; CI, confidence interval

Model I: adjusted for age, pack-years of smoking, body-mass index, low-density lipoprotein-cholesterol, hypertension, and diabetes

Model II: model I + further adjusted for alcohol consumption, C-reactive protein, and lipid medication

Model III: model II+ further adjusted for serum levels of omega-3 fatty acids and meat consumption

**Supplementary table 2. Association of equol producer status (>83 nM) with the presence of coronary calcium score  $\geq 10$  in Japanese men, including heavy alcohol drinkers (n=303)**

---

|                  | <b>Equol producers vs equol non-producers</b> |               |
|------------------|-----------------------------------------------|---------------|
|                  | <b>Odds Ratio</b>                             | <b>95% CI</b> |
| <b>Crude</b>     | 0.62                                          | 0.21, 1.83    |
| <b>Model I</b>   | 0.54                                          | 0.17, 1.72    |
| <b>Model II</b>  | 0.53                                          | 0.16, 1.68    |
| <b>Model III</b> | 0.41                                          | 0.08, 2.06    |
| <b>Model IV</b>  | 0.38                                          | 0.07, 1.94    |

---

CI, confidence interval

Model I: adjusted for age, pack-years of smoking, body-mass index, low-density lipoprotein-cholesterol, hypertension, and diabetes

Model II: model I + further adjusted for alcohol consumption, C-reactive protein, and lipid medication

Model III: model II+ further adjusted for serum levels of omega-3 fatty acids and meat consumption

Model IV: model III+ further adjusted for serum levels of isoflavones

**Supplementary table 3. Multivariable-adjusted odds ratio (95% CI) for the presence of coronary calcium score  $\geq 10$  by equol producing status ( $\geq 40$  nM and  $\geq 20$  nM) in men in Japan (n=272)\***

|                  | Equol producers vs equol non-producers |            |              |            |
|------------------|----------------------------------------|------------|--------------|------------|
|                  | $\geq 40$ nM                           |            | $\geq 20$ nM |            |
|                  | Odds Ratio                             | 95% CI     | Odds Ratio   | 95% CI     |
| <b>Crude</b>     | 0.77                                   | 0.28, 2.14 | 1.09         | 0.48, 2.47 |
| <b>Model I</b>   | 0.62                                   | 0.21, 1.87 | 1.22         | 0.50, 3.00 |
| <b>Model II</b>  | 0.57                                   | 0.19, 1.75 | 1.17         | 0.47, 2.90 |
| <b>Model III</b> | 0.57                                   | 0.19, 1.77 | 1.18         | 0.47, 2.96 |
| <b>Model IV</b>  | 0.49                                   | 0.15, 1.58 | 1.08         | 0.42, 2.77 |

CI, confidence interval

\*After excluding participants with heavy alcohol drinking ( $\geq 69$  g/day)

Model I: adjusted for age, pack-years of smoking, body-mass index, low-density lipoprotein-cholesterol, hypertension, and diabetes

Model II: model I + further adjusted for alcohol consumption, C-reactive protein, and lipid medication

Model III: model II+ further adjusted for serum levels of omega-3 fatty acids and meat consumption

Model IV: model III+ further adjusted for serum levels of isoflavones

CI, confidence interval
